# Supplementary material
Source: publisher figshare collection journal article supplement (https://acs.figshare.com/ndownloader/files/15222029)
Supplement: Supplementary file 1 [file 15222029]

Cmpd #	SMILES
6	OCC1CCN(CC1)c1cc2ncccc2cc1NC(=O)c1cnn2cccnc12
5	NCC1CCN(CC1)c1cc2ncccc2cc1NC(=O)c1cnn2cccnc12
8	COc1cc2ccccc2cc1NC(=O)c1cnn2cccnc12
7	COc1cc2ncccc2cc1NC(=O)c1cnn2cccnc12
10	O=C(Nc1cc2cccnc2cc1N1CCCCC1)c1cnn2cccnc12
14	COc1cc2cc[nH]c2cc1NC(=O)c1cnn2cccnc12
9	COc1cc2cccnc2cc1NC(=O)c1cnn2cccnc12
20	OCC1CCN(CC1)c1cc2nc(sc2cc1NC(=O)c1cnn2cccnc12)N1CCOCC1
15	OCC1CCN(CC1)c1cc2nc[nH]c2cc1NC(=O)c1cnn2cccnc12
21	CN(C)c1nc2cc(c(cc2s1)NC(=O)c1cnn2cccnc12)N1CCC(CO)CC1
12	CN(C)c1ccc2cc(c(cc2n1)N1CCCCC1)NC(=O)c1cnn2cccnc12
11	O=C(Nc1cc2ccc(nc2cc1N1CCCCC1)N1CCOCC1)c1cnn2cccnc12
17	Cn1c(nc2cc(c(cc12)NC(=O)c1cnn2cccnc12)N1CCC(CO)CC1)N1CCOCC1
16	OCC1CCN(CC1)c1cc2nc([nH]c2cc1NC(=O)c1cnn2cccnc12)N1CCOCC1
22	O=C(Nc1cc2sc(nc2cc1N1CCOCC1)N1CCOCC1)c1cnn2cccnc12
18	CCn1c(nc2cc(c(cc12)NC(=O)c1cnn2cccnc12)N1CCC(CO)CC1)N1CCOCC1
19	OCC1CCN(CC1)c1cc2nc(oc2cc1NC(=O)c1cnn2cccnc12)N1CCOCC1
13	O=C(Nc1cc2cnc(nc2cc1N1CCCCC1)N1CCOCC1)c1cnn2cccnc12
23	CC1(C)Cc2cc(c(cc2O1)N1CCOCC1)NC(=O)c1cnn2cccnc12
42	C[C@@]1(CO)Cc2cc(c(cc2O1)N1CCOCC1)NC(=O)c1cnn2cccnc12
41	C[C@]1(CO)Cc2cc(c(cc2O1)N1CCOCC1)NC(=O)c1cnn2cccnc12
24	CC1(C)Cc2cc(c(cc2O1)N1CCC(CO)CC1)NC(=O)c1cnn2cccnc12
38	CC1(C)Cc2cc(c(cc2O1)N1CCN(CCO)CC1)NC(=O)c1cnn2cccnc12
29	CC1(C)Cc2cc(c(cc2O1)N1CCOCC1)NC(=O)c1cnn2cc(cnc12)C1CC1
28	CC1(C)Cc2cc(c(cc2O1)N1CCOCC1)NC(=O)c1cnn2cc(cnc12)C(F)F
44	CN1CCC2(CC1)Cc1cc(c(cc1O2)N1CCOCC1)NC(=O)c1cnn2cccnc12
43	CC(C)(O)[C@@]1(C)Cc2cc(c(cc2O1)N1CCOCC1)NC(=O)c1cnn2cccnc12
37	CC1(C)Cc2cc(c(cc2O1)N1CCCC(O)CC1)NC(=O)c1cnn2cccnc12
39	CC1(C)Cc2cc(c(cc2O1)N1CCN(CC1)CC(=O)N)NC(=O)c1cnn2cccnc12
33	CC1(C)Cc2cc(c(cc2O1)N1CCCC1)NC(=O)c1cnn2cccnc12
35	CC1(C)Cc2cc(c(cc2O1)N1CCC(CC1)C(O)C(F)(F)F)NC(=O)c1cnn2cccnc12
30	CC1(C)Cc2cc(c(cc2O1)N1CCOCC1)NC(=O)c1cnn2cc(cnc12)C#N
40	CNC(=O)CN1CCN(CC1)c1cc2c(cc1NC(=O)c1cnn3cccnc13)CC(C)(C)O2
36	CC1(C)Cc2cc(c(cc2O1)N1CCC(CC1)C(=O)N)NC(=O)c1cnn2cccnc12
32	CC1(C)Cc2cc(c(cc2O1)N1CCOCC1)NC(=O)c1cnn2cc(cnc12)CO
34	CC1(C)Cc2cc(c(cc2O1)N1CCNCC1)NC(=O)c1cnn2cccnc12
31	CC1(C)Cc2cc(c(cc2O1)N1CCOCC1)NC(=O)c1cnn2cc(cnc12)C(=O)N
27	CC1(C)Cc2cc(c(cc2O1)N1CCOCC1)NC(=O)c1cnn2cc(cnc12)OC(F)F
26	CC1(C)Cc2cc(c(cc2O1)N1CCOCC1)NC(=O)c1cnn2cc(cnc12)O
25	CC1(C)Cc2cc(c(cc2O1)N1CCOCC1)NC(=O)c1cnn2c(ccnc12)O
